# Supplementary material for: Anchoring boron on a covalent organic framework as an efficient single atom metal-free photo-electrocatalyst for nitrogen fixation: a first-principles analysis
Source: Royal Society of Chemistry journal article supplement (doi:10.1039/d1cp05699a), 2022-01-01
Supplement: d1cp05699a1.pdf [file d1cp05699a1.pdf]

## Supplementary Information for

# Anchoring Boron on Covalent Organic Framework as Efficient Single Atom Metal-Free Photo-electrocatalyst for Nitrogen Fixation: A First-Principles Analysis

Supriti Dutta, Swapan K Pati\*

*Theoretical Sciences Unit, School of Advanced Materials, Jawaharlal Nehru Centre for Advanced Scientific Research (JNCASR), Bangalore 560064, India.*

\*Corresponding author. E-mail: [pati@jncasr.ac.in](mailto:pati@jncasr.ac.in) Phone: 080-22082839

ORCID ID: [orcid.org/0000-0002-5124-7455](https://orcid.org/0000-0002-5124-7455)

The zero-point energy (ZPE) and entropy contribution (TS) of the reaction intermediates are determined by the following equations.

$$E_{ZPE} = \frac{1}{2} \sum_i h\nu_i \quad (S1)$$

And,

$$-TS = K_B T \sum_i \ln \left( 1 - e^{-\frac{h\nu_i}{K_B T}} \right) - \sum_i h\nu_i \left( \frac{1}{e^{\frac{h\nu_i}{K_B T}} - 1} \right) \quad (S2)$$

Where  $K_B$  is Boltzmann's constant,  $\nu_i$  is the vibrational frequency of the  $i^{\text{th}}$  vibrational mode a, and  $h$  is Planck's constant.

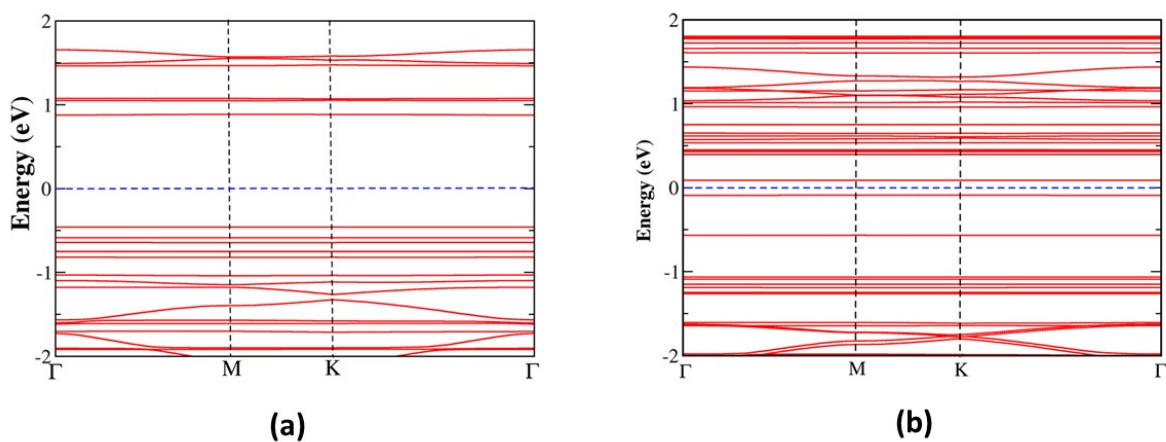

**Fig. S1** Computed band structure of (a) before and (b) after the B addition on the Tp-bpy-COF surface at PBE level.

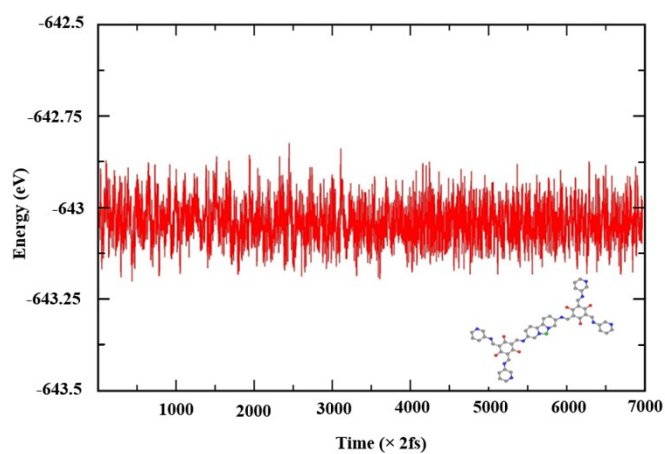

**Fig. S2** Variation of energy with time for AIMD simulation of B@ Tp-bpy-COF at 500 K for a period of 14 ps with an interval of 2 fs.

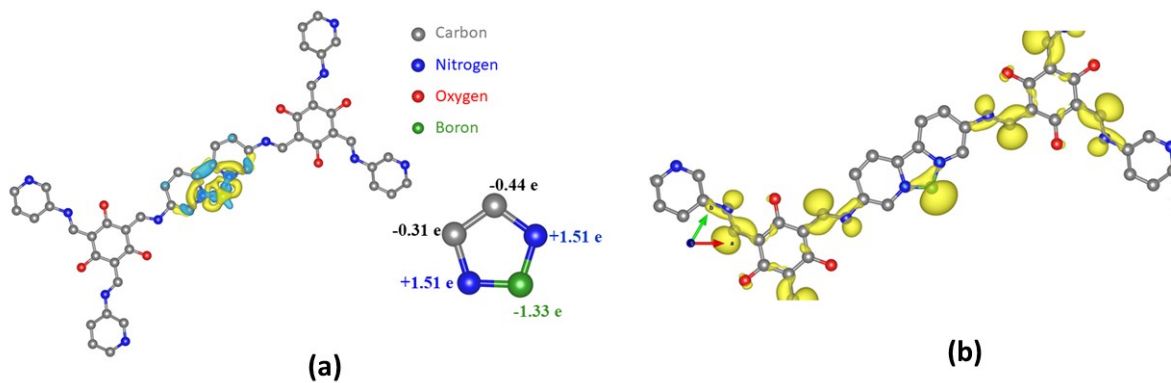

**Fig. S3** (a) The charge density difference of a single B atom anchored on the Tp-bpy-COF. The charge accumulation and depletion are displayed by cyan and yellow region respectively. Isosurface value is taken as  $0.005 \text{ e } \text{Å}^{-3}$ . (b) Spin density for which isosurface is set to be  $0.005 \text{ e } \text{Å}^{-3}$ .

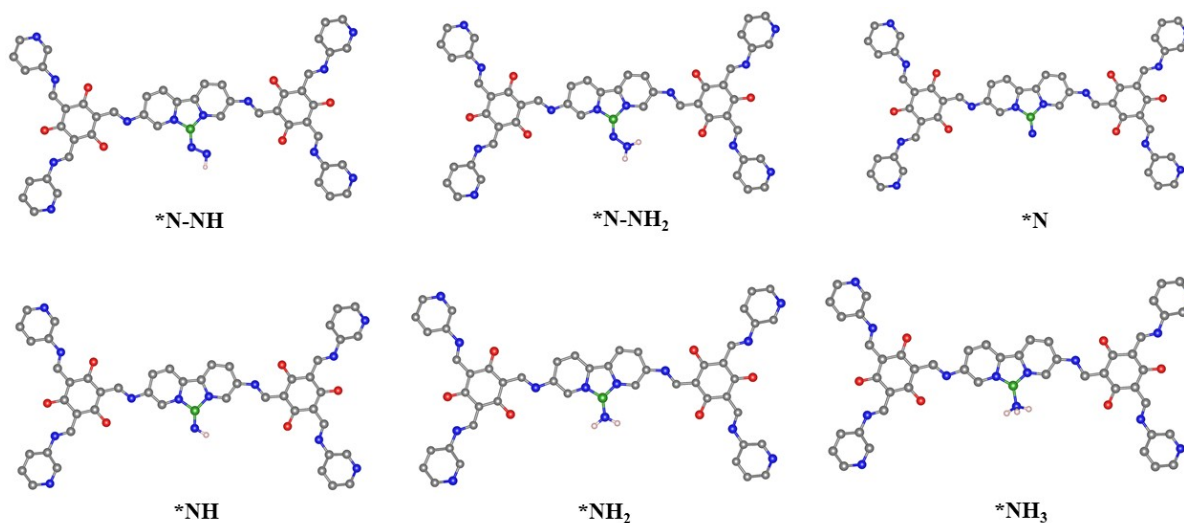

**Fig. S4** Optimized geometries of all possible intermediates along distal pathway. Grey, Blue, Red and Green color represent carbon, nitrogen, oxygen and boron atom respectively.

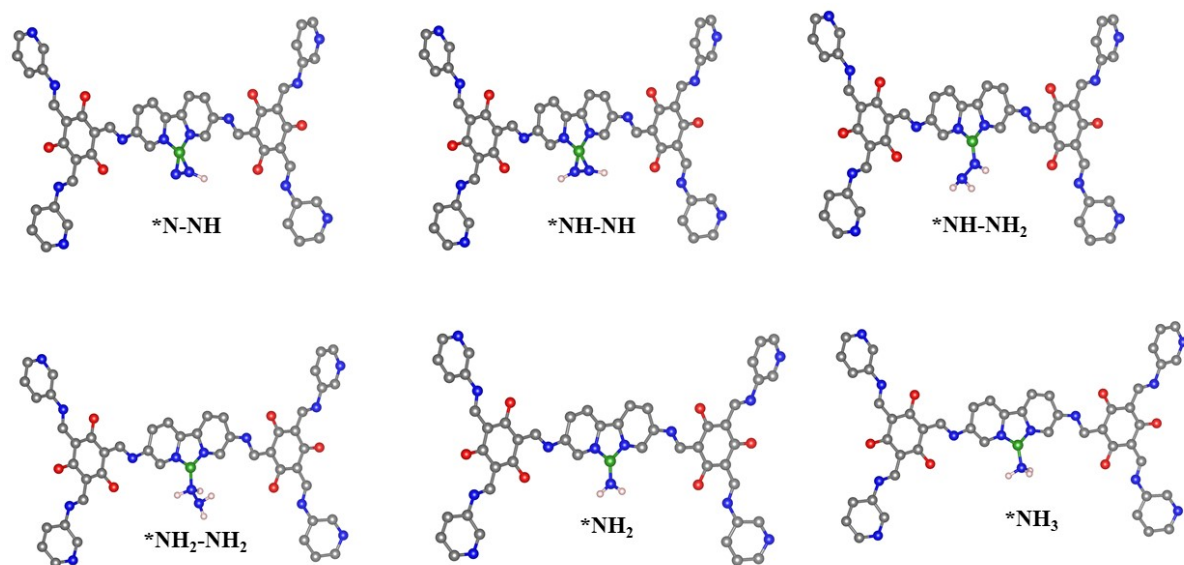

**Fig. S5** Optimized geometries of all possible intermediates along enzymatic pathway. Grey, Blue, Red and Green color represent carbon, nitrogen, oxygen and boron atom respectively.

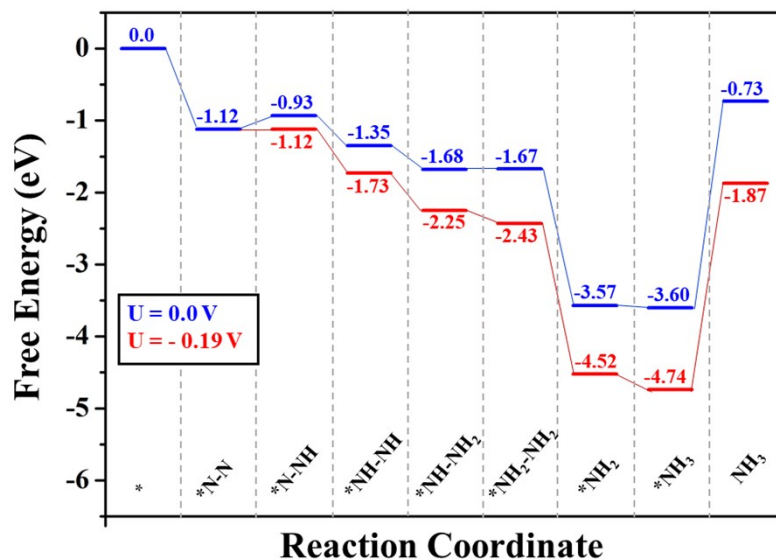

**Fig. S6** Free-energy diagram for alternative pathway over the B@Tp-bpy-COF surface in presence of water solvent.

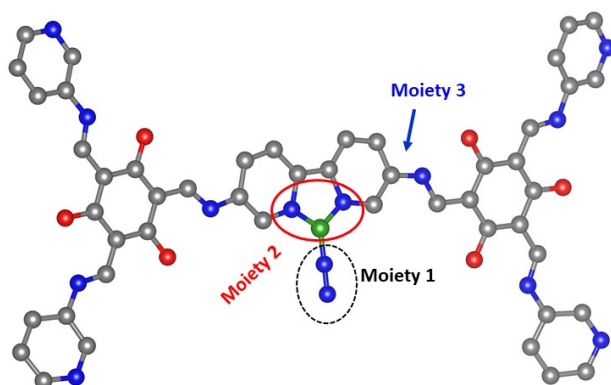

**Fig. S7** Defined three moieties in N<sub>x</sub>H<sub>y</sub> species adsorbed on B@Tp-bpy-COF. Grey, Blue, Red and Green color represent carbon, nitrogen, oxygen and boron atom respectively.

| Species             | E <sub>ZPE</sub> (eV) | TS (eV) |
|---------------------|-----------------------|---------|
| N <sub>2</sub>      | 0.17                  | 0.56    |
| *N-N                | 0.22                  | 0.12    |
| *N-NH               | 0.50                  | 0.14    |
| *NH-NH              | 0.84                  | 0.14    |
| *NH-NH <sub>2</sub> | 1.17                  | 0.19    |

|                                   |      |      |
|-----------------------------------|------|------|
| *NH <sub>2</sub> -NH <sub>2</sub> | 1.50 | 0.25 |
| *NH <sub>2</sub>                  | 0.71 | 0.10 |
| *NH <sub>3</sub>                  | 1.05 | 0.12 |
| NH <sub>3</sub>                   | 0.89 | 0.60 |

**Table S1** The calculated zero-point energy ( $E_{ZPE}$ ) and the product of temperature ( $T=298.15$  K) and entropy ( $S$ ) of the different species along the alternating pathway on B@Tp-bpy-COF catalytic system. \* represents the adsorption site.
